# Supplementary material
Source: Springer Nature journal article supplement (https://www.springermedizin.de/resource/supplementary/12885_2013_4133_MOESM12_ESM.pdf/9465518)

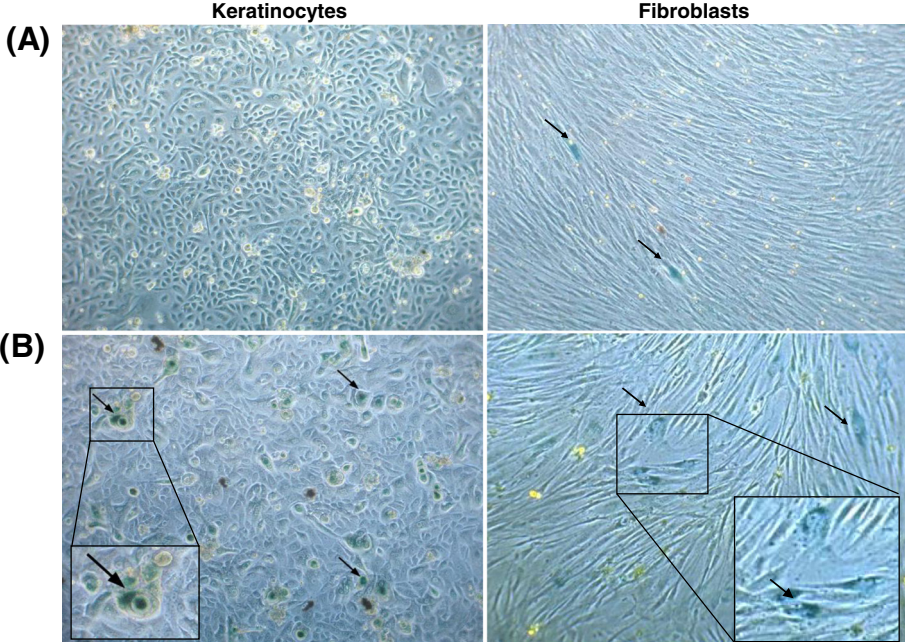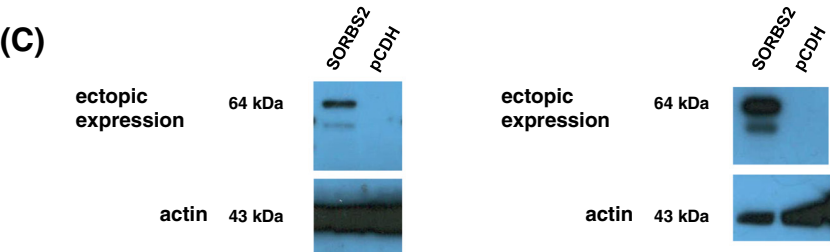

Supplement: MOESM12 [file 9465518]
